# Supplementary material
Source: publisher figshare collection journal article supplement (https://springernature.figshare.com/ndownloader/files/31091624)

***Additional file 6 to Soininen et al Environmental Evidence – Additional figures***

This document contains additional figures showing the spatial (**Additional Figure 1**) and temporal extent (**Additional Figure 2**) of studies across ecological context variables.

**Figure S1.** Spatial extent of studies across ecological context variables. “Small” refers to studies with less than 10km*10km study area (n=291), “large” refers to larger study areas (n=205). “VH” refers to vertebrate herbivores, units for herbivore richness/diversity are proportions of the total Arctic diversity of each metric. Growing season length that is denoted with * is trend. Permafrost classes are 1= sporadic, 2=isolated patches, 3=discontinuous, 4=continuous. Soil type classes are B=cambisols, G=gleysols, I=lithosols, J=fluvisols, O= histosols, P=podzols, R=regosols, T=andosols, W=planosols.


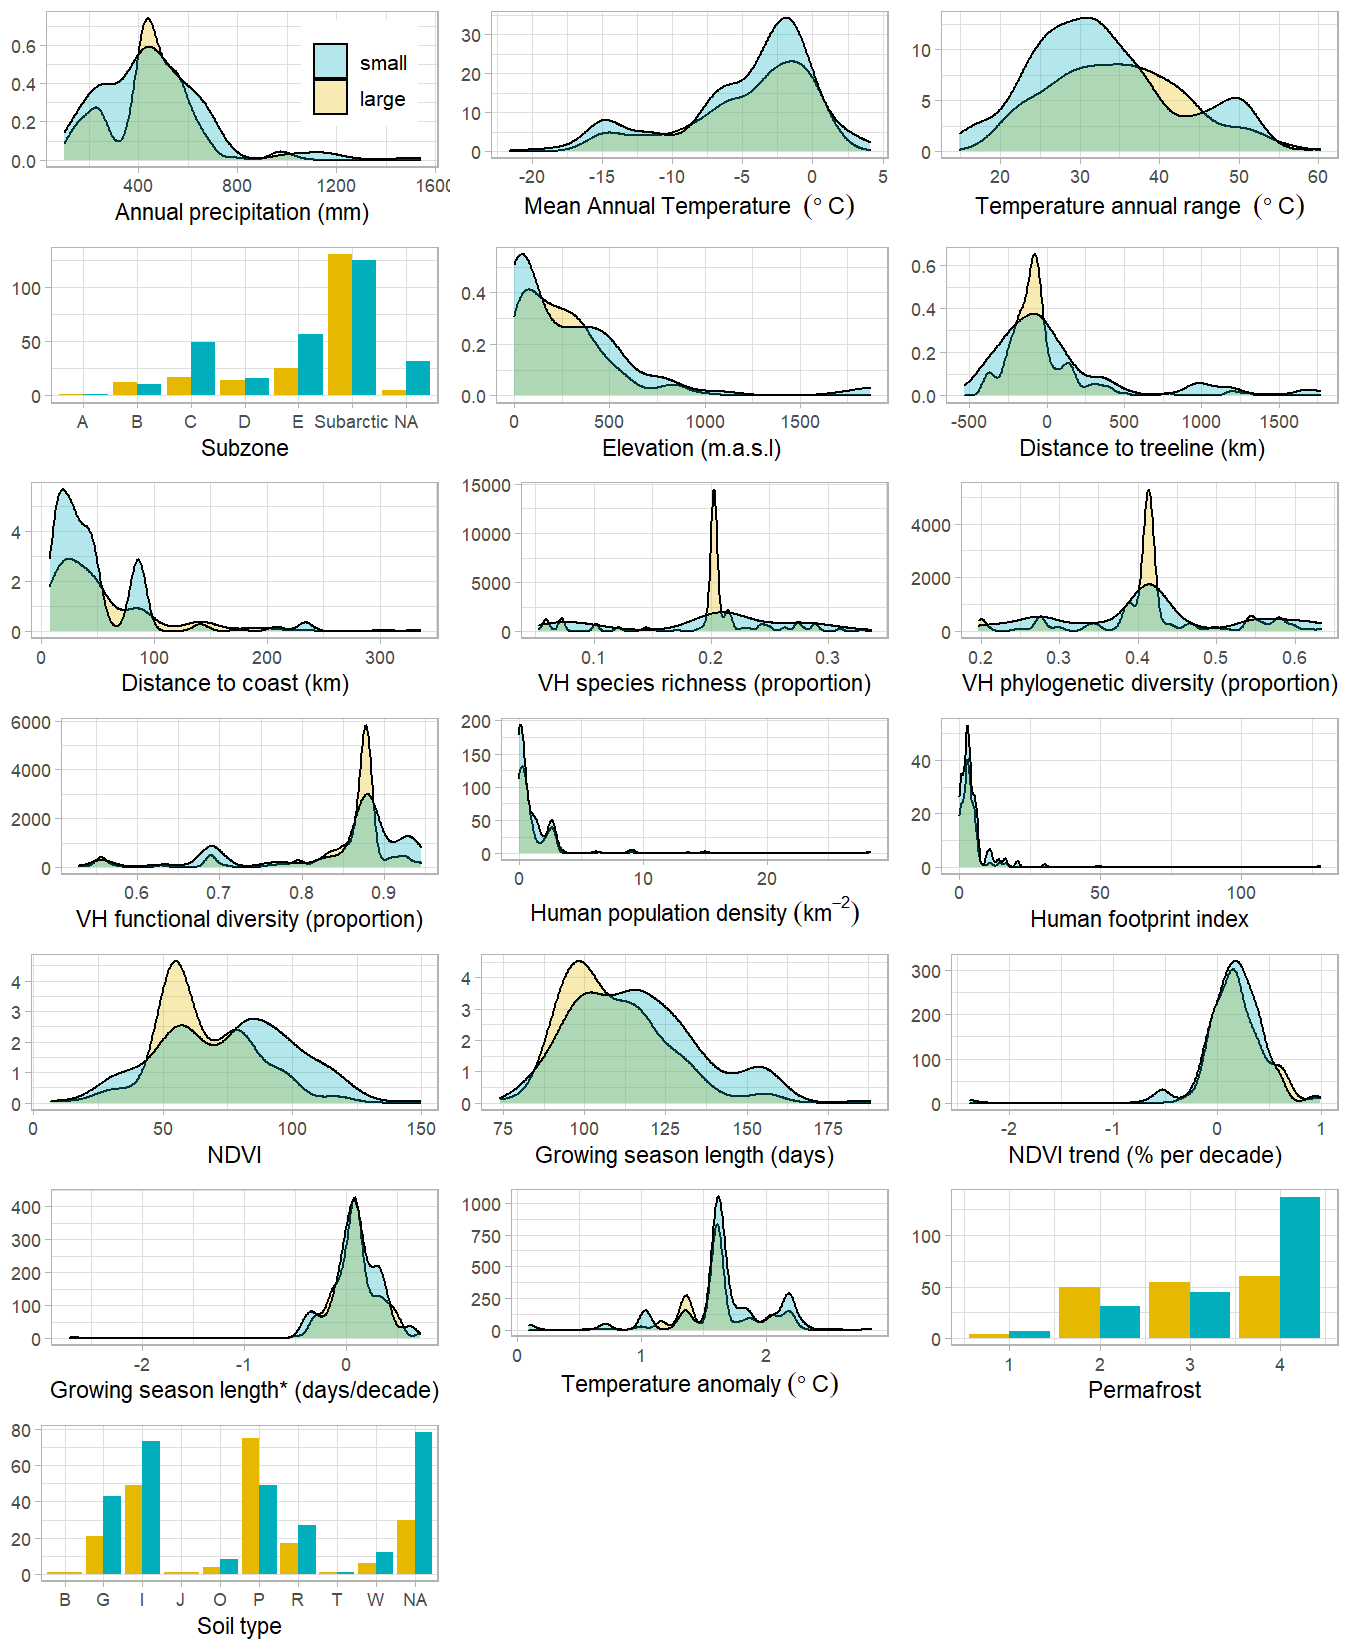


**Figure S2.** Temporalextent of studies across ecological context variables. “one” refers to studies with one year study length (n=262), “longer” to all multiannual studies (n=353). “VH” refers to vertebrate herbivores, units for herbivore richness/diversity are proportions of the total Arctic diversity. Growing season length that is denoted with * is trend. Permafrost classes are 1= sporadic, 2=isolated patches, 3=discontinuous, 4=continuous. Soil type classes are B=cambisols, G=gleysols, I=lithosols, J=fluvisols, O= histosols, P=podzols, R=regosols, T=andosols, W=planosols.


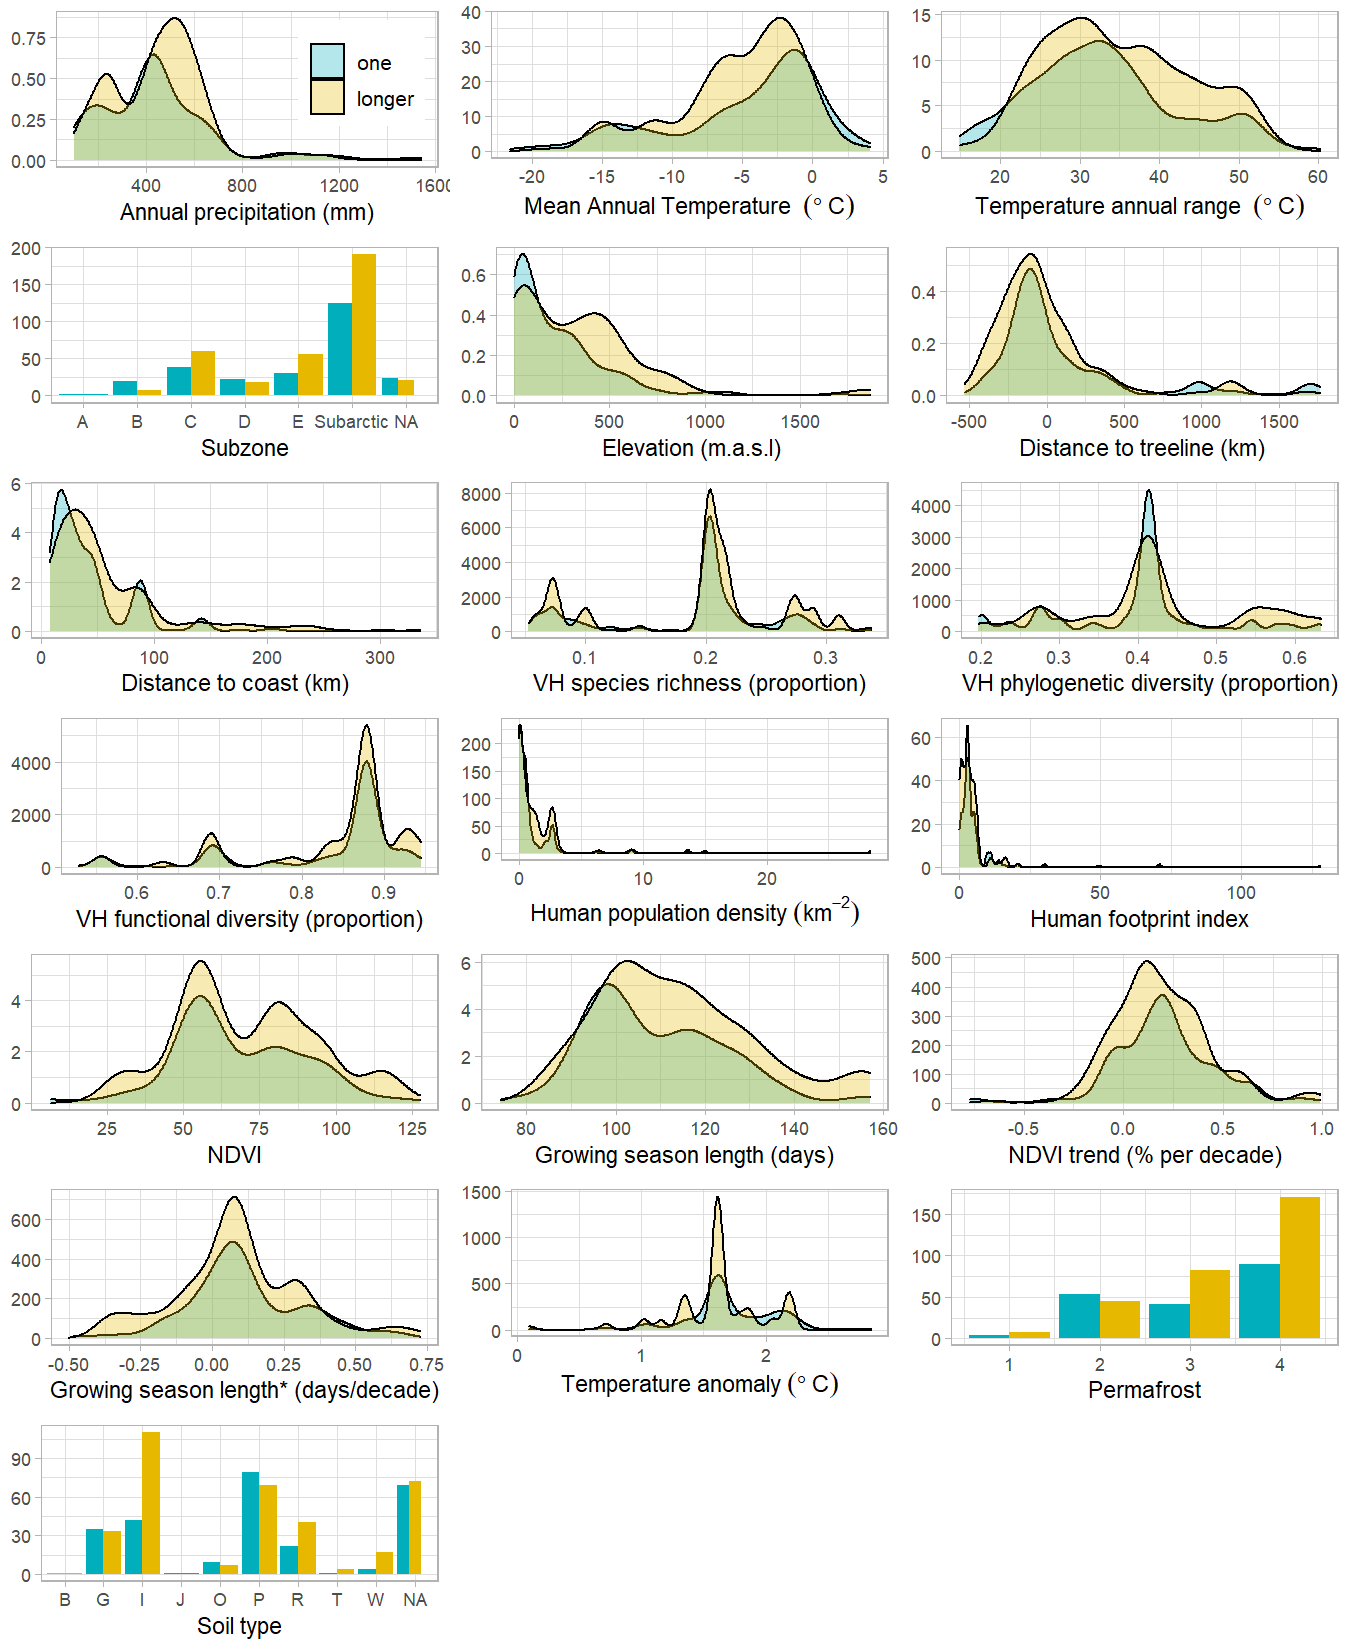

Supplement: Supplementary file 1 [file 31091624]
